# Supplementary material for: Haploidentical vs HLA-matched sibling donor HCT with PTCy prophylaxis: HLA factors and donor age considerations
Source: PubMed Central journal article supplement — Blood Adv. 2024 Aug 23;8(20):5306–14. doi: 10.1182/bloodadvances.2024013853 (PMC11497453; doi:10.1182/bloodadvances.2024013853), 2024-08-23
Supplement: BLOODA_ADV-2024-013853-mmc1.pdf [file BLOODA_ADV-2024-013853-mmc1.pdf]

**Table S1: Univariate analyses**

|                      |                            | OS   |            |        | NRM  |            |        | Relapse |            |        |
|----------------------|----------------------------|------|------------|--------|------|------------|--------|---------|------------|--------|
|                      |                            | HR   | 95% CI     | p      | HR   | 95% CI     | p      | HR      | 95% CI     | p      |
| <b>Donor</b>         | MSD-PTCy                   | Ref  |            |        | Ref  |            |        | Ref     |            |        |
|                      | Haplo-PTCy                 | 0.93 | 0.78, 1.11 | 0.41   | 1.01 | 0.78, 1.32 | 0.92   | 0.85    | 0.71, 1.03 | 0.10   |
| <b>Donor</b>         | MSD-PTCy                   | Ref  |            |        | Ref  |            |        | Ref     |            |        |
|                      | Haplo: B-leader-Matched    | 0.88 | 0.73, 1.06 | 0.18   | 0.89 | 0.66, 1.19 | 0.42   | 0.84    | 0.68, 1.03 | 0.09   |
|                      | Haplo: B-leader-Mismatched | 1.02 | 0.83, 1.24 | 0.89   | 1.22 | 0.9, 1.65  | 0.21   | 0.88    | 0.7, 1.11  | 0.27   |
| <b>Donor</b>         | MSD-PTCy                   | Ref  |            |        | Ref  |            |        | Ref     |            |        |
|                      | Haplo: DRB1-Mismatched     | 0.92 | 0.77, 1.1  | 0.38   | 1.02 | 0.77, 1.34 | 0.90   | 0.81    | 0.66, 0.98 | 0.03   |
|                      | Haplo: DRB1-Matched        | 0.97 | 0.73, 1.27 | 0.80   | 0.98 | 0.64, 1.51 | 0.94   | 1.17    | 0.88, 1.55 | 0.29   |
| <b>Patient Age</b>   | <50 years                  | Ref  |            |        | Ref  |            |        | Ref     |            |        |
|                      | >=50 years                 | 1.69 | 1.45, 1.98 | <.0001 | 2.04 | 1.6, 2.6   | <.0001 | 1.27    | 1.07, 1.51 | 0.0053 |
| <b>Donor Age</b>     | Continuous                 | 1.02 | 1.01, 1.02 | <.0001 | 1.02 | 1.01, 1.03 | <.0001 | 1.01    | 1, 1.01    | 0.05   |
| <b>Conditioning</b>  | MAC                        | Ref  |            |        | Ref  |            |        | Ref     |            |        |
|                      | RIC/NMA                    | 1.28 | 1.09, 1.49 | 0.002  | 1.08 | 0.85, 1.36 | 0.54   | 1.62    | 1.36, 1.92 | <.0001 |
| <b>Graft type</b>    | BM                         | Ref  |            |        | Ref  |            |        | Ref     |            |        |
|                      | PB                         | 1.10 | 0.94, 1.3  | 0.238  | 1.39 | 1.07, 1.8  | 0.0137 | 0.88    | 0.74, 1.04 | 0.14   |
| <b>Disease</b>       | AML/ALL                    | Ref  |            |        | Ref  |            |        | Ref     |            |        |
|                      | MDS                        | 1.43 | 1.18, 1.73 | 0.0002 | 1.97 | 1.51, 2.58 | <.0001 | 1.29    | 1.03, 1.6  | 0.03   |
| <b>Disease Stage</b> | Early-Intermediate         | Ref  |            |        | Ref  |            |        | Ref     |            |        |
|                      | Advanced                   | 1.80 | 1.54, 2.12 | <.0001 | 1.68 | 1.31, 2.15 | <.0001 | 1.86    | 1.56, 2.23 | <.0001 |
| <b>KPS</b>           | <90                        | Ref  |            |        | Ref  |            |        | Ref     |            |        |
|                      | >=90                       | 0.73 | 0.62, 0.85 | <.0001 | 0.73 | 0.57, 0.92 | 0.009  | 0.75    | 0.63, 0.89 | 0.0011 |
| <b>HCT-CI</b>        | 0-2                        | Ref  |            |        | Ref  |            |        | Ref     |            |        |
|                      | >=3                        | 1.46 | 1.26, 1.71 | <.0001 | 1.47 | 1.16, 1.87 | 0.001  | 1.49    | 1.25, 1.76 | <.0001 |
| <b>D/R Sex</b>       | Not Fem-to-Male            | Ref  |            |        | Ref  |            |        | Ref     |            |        |
|                      | Fem-to-Male                | 1.07 | 0.89, 1.28 | 0.49   | 1.23 | 0.94, 1.61 | 0.13   | 1.03    | 0.84, 1.26 | 0.80   |
| <b>D/R CMV</b>       | Neg/Neg                    | Ref  |            |        | Ref  |            |        | Ref     |            |        |
|                      | Pos/Pos                    | 1.36 | 1.09, 1.7  | 0.006  | 1.73 | 1.2, 2.49  | 0.003  | 0.97    | 0.77, 1.23 | 0.81   |
|                      | Pos/Neg                    | 1.11 | 0.8, 1.55  | 0.5318 | 1.92 | 1.19, 3.1  | 0.007  | 0.72    | 0.49, 1.06 | 0.09   |
|                      | Neg/Pos                    | 1.36 | 1.07, 1.73 | 0.01   | 1.38 | 0.92, 2.07 | 0.12   | 1.30    | 1.02, 1.66 | 0.03   |
| <b>Race</b>          | Non-Caucasian              | Ref  |            |        | Ref  |            |        | Ref     |            |        |
|                      | Caucasian                  | 1.13 | 0.94, 1.37 | 0.20   | 1.16 | 0.87, 1.55 | 0.31   | 1.24    | 1, 1.53    | 0.05   |

|                      |                            |                         |               |          |  |                     |               |          |  |      |            |      |
|----------------------|----------------------------|-------------------------|---------------|----------|--|---------------------|---------------|----------|--|------|------------|------|
| <b>Time to HCT</b>   | Continuous                 | 1.00                    | 1, 1          | 0.55     |  | 1.00                | 1, 1.01       | 0.07     |  | 1.00 | 0.99, 1    | 0.52 |
| <b>Year of HCT</b>   | Continuous                 | 0.97                    | 0.92, 1.02    | 0.27     |  | 0.98                | 0.91, 1.07    | 0.70     |  | 0.98 | 0.93, 1.04 | 0.55 |
|                      |                            |                         |               |          |  |                     |               |          |  |      |            |      |
|                      |                            | <b>Acute GVHD II-IV</b> |               |          |  | <b>Chronic GVHD</b> |               |          |  |      |            |      |
|                      |                            | <b>HR</b>               | <b>95% CI</b> | <b>p</b> |  | <b>HR</b>           | <b>95% CI</b> | <b>p</b> |  |      |            |      |
| <b>Donor</b>         | MSD-PTCy                   | Ref                     |               |          |  | Ref                 |               |          |  |      |            |      |
|                      | Haplo-PTCy                 | 0.95                    | 0.78, 1.17    | 0.65     |  | 0.93                | 0.76, 1.14    | 0.47     |  |      |            |      |
| <b>Donor</b>         | MSD-PTCy                   | Ref                     |               |          |  | Ref                 |               |          |  |      |            |      |
|                      | Haplo: B-leader-Matched    | 0.97                    | 0.78, 1.21    | 0.77     |  | 0.89                | 0.71, 1.11    | 0.29     |  |      |            |      |
|                      | Haplo: B-leader-Mismatched | 0.93                    | 0.73, 1.19    | 0.58     |  | 1.00                | 0.78, 1.27    | 0.98     |  |      |            |      |
| <b>Donor</b>         | MSD-PTCy                   | Ref                     |               |          |  | Ref                 |               |          |  |      |            |      |
|                      | Haplo: DRB1-Mismatched     | 0.99                    | 0.8, 1.22     | 0.92     |  | 0.94                | 0.76, 1.16    | 0.55     |  |      |            |      |
|                      | Haplo: DRB1-Matched        | 0.76                    | 0.53, 1.08    | 0.13     |  | 0.87                | 0.62, 1.21    | 0.41     |  |      |            |      |
| <b>Patient Age</b>   | <50 years                  | Ref                     |               |          |  | Ref                 |               |          |  |      |            |      |
|                      | >=50 years                 | 0.92                    | 0.77, 1.11    | 0.40     |  | 0.92                | 0.77, 1.11    | 0.40     |  |      |            |      |
| <b>Donor Age</b>     | Continuous                 | 1.00                    |               | 1.00     |  | 1.00                | 1, 1.01       | 0.18     |  |      |            |      |
| <b>Conditioning</b>  | MAC                        | Ref                     |               |          |  | Ref                 |               |          |  |      |            |      |
|                      | RIC/NMA                    | 0.79                    | 0.65, 0.95    | 0.01     |  | 0.80                | 0.67, 0.96    | 0.02     |  |      |            |      |
| <b>Graft type</b>    | BM                         | Ref                     |               |          |  | Ref                 |               |          |  |      |            |      |
|                      | PB                         | 1.31                    | 1.08, 1.6     | 0.007    |  | 2.21                | 1.78, 2.74    | <.0001   |  |      |            |      |
| <b>Disease</b>       | AML/ALL                    | Ref                     |               |          |  | Ref                 |               |          |  |      |            |      |
|                      | MDS                        | 0.98                    | 0.76, 1.26    | 0.88     |  | 0.96                | 0.74, 1.24    | 0.76     |  |      |            |      |
| <b>Disease Stage</b> | Early-Intermediate         | Ref                     |               |          |  | Ref                 |               |          |  |      |            |      |
|                      | Advanced                   | 1.15                    | 0.94, 1.41    | 0.17     |  | 0.98                | 0.79, 1.21    | 0.81     |  |      |            |      |
| <b>KPS</b>           | <90                        | Ref                     |               |          |  | Ref                 |               |          |  |      |            |      |
|                      | >=90                       | 0.80                    | 0.66, 0.96    | 0.02     |  | 0.85                | 0.71, 1.02    | 0.08     |  |      |            |      |
| <b>HCT-CI</b>        | 0-2                        | Ref                     |               |          |  | Ref                 |               |          |  |      |            |      |
|                      | >=3                        | 1.07                    | 0.89, 1.29    | 0.48     |  | 1.00                | 0.84, 1.21    | 0.96     |  |      |            |      |
| <b>D/R Sex</b>       | Not Fem-to-Male            | Ref                     |               |          |  | Ref                 |               |          |  |      |            |      |
|                      | Fem-to-Male                | 1.11                    | 0.9, 1.38     | 0.33     |  | 1.43                | 1.17, 1.76    | 0.0006   |  |      |            |      |
| <b>D/R CMV</b>       | Neg/Neg                    | Ref                     |               |          |  | Ref                 |               |          |  |      |            |      |
|                      | Pos/Pos                    | 0.92                    | 0.71, 1.19    | 0.52     |  | 1.35                | 1.05, 1.74    | 0.02     |  |      |            |      |
|                      | Pos/Neg                    | 0.99                    | 0.68, 1.44    | 0.94     |  | 1.13                | 0.78, 1.65    | 0.51     |  |      |            |      |
|                      | Neg/Pos                    | 1.12                    | 0.86, 1.46    | 0.42     |  | 1.12                | 0.84, 1.48    | 0.45     |  |      |            |      |
| <b>Race</b>          | Non-Caucasian              | Ref                     |               |          |  | Ref                 |               |          |  |      |            |      |
|                      | Caucasian                  | 1.65                    | 1.29, 2.11    | <.0001   |  | 1.00                | 0.81, 1.25    | 0.99     |  |      |            |      |
| <b>Time to HCT</b>   | Continuous                 | 1.00                    | 0.99, 1       | 0.20     |  | 1.00                | 1, 1.01       | 0.61     |  |      |            |      |
| <b>Year of HCT</b>   | Continuous                 | 1.00                    | 0.94, 1.07    | 0.93     |  | 0.98                | 0.92, 1.05    | 0.57     |  |      |            |      |

*Abbreviations: ALL, Acute Lymphoblastic Leukemia; AML, Acute Myeloid Leukemia; BM, Bone Marrow; CI, Confidence Interval; CMV, Cytomegalovirus; Fem-to-Male, Female donor to male recipient; GVHD, Graft-versus-Host Disease; Haplo, haploidentical; HR, Hazard Ratio; HCT, Hematopoietic Cell Transplantation; HCT-CI, Hematopoietic Cell Transplantation Comorbidity Index; KPS, Karnofsky Performance Score; MAC, Mycobacterial infection; MDS, Myelodysplastic Syndrome; MSD, Matched Sibling Donor; NMA, Non-myeloablative conditioning; Neg, Negative; NRM, non-relapse mortality; OS, overall survival; Pos, Positive; PB, Peripheral Blood; PTCy, Post-transplant cyclophosphamide; Ref, Reference; RIC, Reduced-intensity conditioning.*

**Table S2: Multivariate Analysis: Propensity Matched Cohort**

| <b>Overall Survival</b>      |                            |           |               |          |
|------------------------------|----------------------------|-----------|---------------|----------|
|                              |                            | <b>HR</b> | <b>95% CI</b> | <b>P</b> |
| Donor                        | MSD-PTCy                   | Ref       |               |          |
|                              | Haplo-PTCy                 | 0.94      | 0.78, 1.14    | 0.54     |
|                              |                            |           |               |          |
| Donor                        | MSD-PTCy                   | Ref       |               |          |
|                              | Haplo: B-leader-Matched    | 0.89      | 0.72, 1.09    | 0.24     |
|                              | Haplo: B-leader-Mismatched | 1.04      | 0.84, 1.3     | 0.72     |
|                              |                            |           |               |          |
| Patient age                  | <50 years                  |           |               |          |
|                              | >=50 years                 | 1.41      | 1.17, 1.69    | 0.0003   |
| Donor age                    | Continuous                 | 1.01      | 1.007, 1.01   | 0.03     |
| Disease Stage                | Early-Intermediate         |           |               |          |
|                              | Advanced                   | 1.62      | 1.37, 1.91    | <.0001   |
| HCT-CI                       | 0-2                        |           |               |          |
|                              | >=3                        | 1.36      | 1.16, 1.59    | 0.0002   |
| D/R CMV                      | Neg/Neg                    |           |               |          |
|                              | Pos/Pos                    | 1.49      | 1.19, 1.86    | 0.0005   |
|                              | Pos/Neg                    | 1.26      | 0.9, 1.77     | 0.17     |
|                              | Neg/Pos                    | 1.42      | 1.12, 1.81    | 0.005    |
|                              |                            |           |               |          |
| <b>Non-Relapse Mortality</b> |                            |           |               |          |
| Donor                        | MSD-PTCy                   | Ref       |               |          |
|                              | Haplo-PTCy                 | 0.98      | 0.72, 1.32    | 0.87     |
|                              |                            |           |               |          |
| Donor                        | MSD-PTCy                   | Ref       |               |          |
|                              | Haplo: B-leader-Matched    | 0.83      | 0.6, 1.15     | 0.27     |

|                 |                            |      |            |        |
|-----------------|----------------------------|------|------------|--------|
|                 | Haplo: B-leader-Mismatched | 1.21 | 0.86, 1.69 | 0.27   |
| Patient age     |                            |      |            |        |
|                 | >=50 years                 | 2.08 | 1.6, 2.7   | <.0001 |
| Disease Stage   |                            |      |            |        |
|                 | Advanced                   | 1.46 | 1.13, 1.89 | 0.004  |
| HCT-CI          | 0-2                        |      |            |        |
|                 | >=3                        | 1.41 | 1.1, 1.8   | 0.007  |
| D/R CMV         | Neg/Neg                    |      |            |        |
|                 | Pos/Pos                    | 1.91 | 1.32, 2.76 | 0.0006 |
|                 | Pos/Neg                    | 2.26 | 1.4, 3.67  | 0.0009 |
|                 | Neg/Pos                    | 1.41 | 0.94, 2.11 | 0.10   |
| Time to HCT     |                            | 1.01 | 1, 1.01    | 0.005  |
|                 |                            |      |            |        |
| <b>Relapse*</b> |                            |      |            |        |
| Donor           | MSD-PTCy                   | Ref  |            |        |
|                 | Haplo-PTCy                 | 0.87 | 0.7, 1.08  | 0.19   |
|                 |                            |      |            |        |
| Donor           | MSD-PTCy                   | Ref  |            |        |
|                 | Haplo: DRB1-Mismatched     | 0.82 | 0.66, 1.02 | 0.07   |
|                 | Haplo: DRB1-Matched        | 1.14 | 0.85, 1.54 | 0.39   |
|                 |                            |      |            |        |
| Conditioning    | MAC                        | Ref  |            |        |
|                 | RIC/NMA                    | 1.47 | 1.22, 1.77 | <.0001 |
| HCT-CI          | 0-2                        | Ref  |            |        |
|                 | >=3                        | 1.30 | 1.09, 1.56 | 0.004  |
| D/R CMV         | Neg/Neg                    | Ref  |            |        |
|                 | Pos/Pos                    | 1.07 | 0.85, 1.36 | 0.55   |
|                 | Pos/Neg                    | 0.79 | 0.53, 1.16 | 0.22   |
|                 | Neg/Pos                    | 1.34 | 1.04, 1.72 | 0.02   |
|                 |                            |      |            |        |

| <b>Chronic GVHD</b>               |                 |      |            |        |
|-----------------------------------|-----------------|------|------------|--------|
| Donor                             | MSD-PTCy        | Ref  |            |        |
|                                   | Haplo-PTCy      | 0.99 | 0.73, 1.34 | 0.92   |
| Graft type                        | BM              |      |            |        |
|                                   | PB              | 1.76 | 1.37, 2.27 | <.0001 |
| D/R Sex                           | Not Fem-to-Male |      |            |        |
|                                   | Fem-to-Male     | 1.60 | 1.29, 1.98 | <.0001 |
|                                   |                 |      |            |        |
| <b>Acute GVHD, grade II-IV **</b> |                 |      |            |        |
| Donor                             | MSD-PTCy        | Ref  |            |        |
|                                   | Haplo-PTCy      | 0.95 | 0.71, 1.27 | 0.74   |

\* Stratified by Disease Stage

\*\* Stratified by Race

Abbreviations are explained in Table S1.

**Table S3: IPTW Analysis of entire cohort comparing haploidentical vs MSD groups**

| <b>OS</b>     |                            | <b>HR</b> | <b>95% CI</b> | <b>p</b> |
|---------------|----------------------------|-----------|---------------|----------|
| Donor         | MSD-PTCy                   | Ref       |               |          |
|               | Haplo-PTCy                 | 1.08      | 0.85, 1.37    | 0.51     |
|               |                            |           |               |          |
| Donor         | MSD-PTCy                   | Ref       |               |          |
|               | Haplo: B-leader-Matched    | 0.99      | 0.78, 1.27    | 0.96     |
|               | Haplo: B-leader-Mismatched | 1.24      | 0.96, 1.59    | 0.10     |
|               |                            |           |               |          |
| Patient age   | <50 years                  | Ref       |               |          |
|               | >=50 years                 | 1.47      | 1.29, 1.68    | <.0001   |
| Donor age     | Continuous                 | 1.01      | 1.002,1.01    | 0.005    |
| Disease Stage | Advanced                   | Ref       |               |          |
|               | Early-Intermediate         | 0.69      | 0.61, 0.79    | <.0001   |
| HCT-CI        | 0-2                        | Ref       |               |          |
|               | >=3                        | 1.47      | 1.29, 1.66    | <.0001   |
| KPS           | <90                        | Ref       |               |          |
|               | >=90                       | 0.78      | 0.68-0.88     | <.0001   |
| D/R CMV       | Neg/Neg                    | Ref       |               |          |
|               | Pos/Pos                    | 1.60      | 1.33, 1.85    | <.0001   |
|               | Pos/Neg                    | 1.37      | 1.07, 1.75    | 0.01     |
|               | Neg/Pos                    | 1.51      | 1.27, 1.79    | <.0001   |
|               |                            |           |               |          |
| <b>NRM</b>    |                            | <b>HR</b> |               | <b>p</b> |
| Donor         | MSD-PTCy                   | Ref       |               |          |
|               | Haplo-PTCy                 | 1.22      | 0.86, 1.74    | 0.27     |
|               |                            |           |               |          |
| Donor         | MSD-PTCy                   | Ref       |               |          |

|                  |                            |      |            |        |
|------------------|----------------------------|------|------------|--------|
|                  | Haplo: B-leader-Matched    | 1.07 | 0.74, 1.56 | 0.72   |
|                  | Haplo: B-leader-Mismatched | 1.48 | 1.01, 2.17 | 0.04   |
| Patient age      | < 50 years                 |      |            |        |
|                  | >=50 years                 | 1.89 | 1.54, 2.31 | <.0001 |
| Disease          | AML                        |      |            |        |
|                  | ALL                        | 1.17 | 0.9, 1.53  | 0.24   |
|                  | MDS                        | 1.80 | 1.46, 2.23 | <.0001 |
| KPS              | <90                        |      |            |        |
|                  | >=90                       | 0.74 | 0.61, 0.9  | 0.003  |
| HCT-CI           | 0-2                        |      |            |        |
|                  | >=3                        | 1.34 | 1.11, 1.63 | 0.003  |
| D/R CMV          | Neg/Neg                    |      |            |        |
|                  | Pos/Pos                    | 2.14 | 1.63, 2.8  | <.0001 |
|                  | Pos/Neg                    | 2.43 | 1.71, 3.46 | <.0001 |
|                  | Neg/Pos                    | 1.41 | 1.05, 1.9  | 0.02   |
|                  |                            |      |            |        |
| <b>Relapse *</b> |                            |      |            |        |
| Donor            | MSD-PTCy                   | Ref  |            |        |
|                  | Haplo-PTCy                 | 1.00 | 0.76, 1.32 | 0.99   |
|                  |                            |      |            |        |
| Donor            | MSD-PTCy                   | Ref  |            |        |
|                  | Haplo: DRB1-Mismatched     | 0.94 | 0.71, 1.24 | 0.66   |
|                  | Haplo: DRB1-Matched        | 1.32 | 0.96, 1.82 | 0.08   |
| Disease          | AML                        | Ref  |            |        |
|                  | ALL                        | 1.15 | 0.96, 1.38 | 0.14   |
|                  | MDS                        | 0.70 | 0.57, 0.86 | 0.0006 |
| Conditioning     | MAC                        | Ref  |            |        |
|                  | RIC/NMA                    | 1.45 | 1.25, 1.68 | <.0001 |



|            |         |      |            |        |
|------------|---------|------|------------|--------|
| Graft type | BM      | Ref  |            |        |
|            | PB      | 0.80 | 0.67, 0.95 | 0.01   |
| KPS        | <90     | Ref  |            |        |
|            | >=90    | 0.85 | 0.74, 0.98 | 0.02   |
| HCT-CI     | 0-2     | Ref  |            |        |
|            | >=3     | 1.39 | 1.21, 1.6  | <.0001 |
| D/R CMV    | Neg/Neg | Ref  |            |        |
|            | Pos/Pos | 1.02 | 0.86, 1.21 | 0.84   |
|            | Pos/Neg | 0.83 | 0.63, 1.09 | 0.18   |
|            | Neg/Pos | 1.29 | 1.08, 1.54 | 0.005  |

\* Stratified by Disease Stage

Abbreviations are explained in Table S1.

**Table S4: IPTW Analysis restricted to AML patients only comparing haploidentical vs MSD groups**

| <b>OS</b>     |                            |           |               |          |
|---------------|----------------------------|-----------|---------------|----------|
|               |                            | <b>HR</b> | <b>95% CI</b> | <b>p</b> |
| Donor         | MSD-PTCy                   | Ref       |               |          |
|               | Haplo                      | 1.03      | 0.78, 1.36    | 0.81     |
| Donor         | MSD-PTCy                   | Ref       |               |          |
|               | Haplo: B leader matched    | 0.96      | 0.72, 1.28    | 0.80     |
|               | Haplo: B leader mismatched | 1.17      | 0.86, 1.55    | 0.33     |
| Patient Age   | <50 years                  | Ref       |               |          |
|               | >=50 years                 | 1.61      | 1.38, 1.87    | <.0001   |
| Disease Stage | Advanced                   | Ref       |               |          |
|               | Early-Intermediate         | 0.51      | 0.43, 0.61    | <.0001   |
| HCT-CI        | 0-2                        | Ref       |               |          |
|               | >=3                        | 1.35      | 1.16, 1.58    | <.0001   |
| KPS           | <90                        | Ref       |               |          |
|               | >=90                       | 0.83      | 0.71-0.97     | 0.02     |
| D/R CMV       | Neg/Neg                    | Ref       |               |          |
|               | Pos/Pos                    | 1.39      | 1.13, 1.70    | 0.002    |
|               | Pos/Neg                    | 1.23      | 0.90, 1.68    | 0.22     |
|               | Neg/Pos                    | 1.48      | 1.19, 1.84    | 0.0003   |
| <b>NRM</b>    |                            |           |               |          |
|               |                            | <b>HR</b> | <b>95% CI</b> | <b>p</b> |
| Donor         | MSD-PTCy                   | Ref       |               |          |
|               | Haplo                      | 1.22      | 0.85, 1.74    | 0.29     |

|                  |                            |           |               |          |
|------------------|----------------------------|-----------|---------------|----------|
| Donor            | MSD-PTCy                   | Ref       |               |          |
|                  | Haplo: B leader matched    | 1.05      | 0.71, 1.55    | 0.80     |
|                  | Haplo: B leader mismatched | 1.50      | 1.01, 2.23    | 0.05     |
|                  |                            |           |               |          |
| Patient Age      | < 50 years                 | Ref       |               |          |
|                  | >=50 years                 | 1.62      | 1.26, 2.07    | 0.0001   |
| HCT-CI           | 0-2                        | Ref       |               |          |
|                  | >=3                        | 1.49      | 1.17, 1.9     | 0.0012   |
| D/R CMV          | Neg/Neg                    | Ref       |               |          |
|                  | Pos/Pos                    | 2.22      | 1.51, 3.28    | <.0001   |
|                  | Pos/Neg                    | 2.46      | 1.49, 4.06    | 0.0004   |
|                  | Neg/Pos                    | 1.69      | 1.13, 2.55    | 0.01     |
|                  |                            |           |               |          |
| <b>Relapse *</b> |                            |           |               |          |
|                  |                            | <b>HR</b> | <b>95% CI</b> | <b>p</b> |
| Donor            | MSD-PTCy                   | Ref       |               |          |
|                  | Haplo                      | 1.11      | 0.8, 1.55     | 0.54     |
|                  |                            |           |               |          |
| Donor            | MSD-PTCy                   | Ref       |               |          |
|                  | Haplo: DRB1 mismatched     | 1.06      | 0.76, 1.48    | 0.75     |
|                  | Haplo: DRB1 matched        | 1.48      | 0.99, 2.2     | 0.06     |
|                  |                            |           |               |          |
| Conditioning     | MAC                        | Ref       |               |          |
|                  | RIC/NMA                    | 1.46      | 1.21, 1.76    | <.0001   |
| Graft type       | BM                         | Ref       |               |          |
|                  | PB                         | 0.76      | 0.61, 0.96    | 0.02     |
| KPS              | <90                        | Ref       |               |          |
|                  | >=90                       | 0.91      | 0.76, 1.09    | 0.31     |
| HCT-CI           | 0-2                        | Ref       |               |          |

|         |         |      |            |        |
|---------|---------|------|------------|--------|
|         | >=3     | 1.10 | 0.93, 1.31 | 0.27   |
| D/R CMV | Neg/Neg | Ref  |            |        |
|         | Pos/Pos | 1.17 | 0.94, 1.47 | 0.16   |
|         | Pos/Neg | 0.89 | 0.64, 1.25 | 0.50   |
|         | Neg/Pos | 1.48 | 1.18, 1.86 | 0.0006 |

\* *Stratified by Disease Stage*

*Abbreviations are explained in Table S1.*

**Table S5: Multivariate Analysis: Younger Haploidentical vs Older MSD**

| <b>OS</b>     |                                    |           |               |          |
|---------------|------------------------------------|-----------|---------------|----------|
|               |                                    | <b>HR</b> | <b>95% CI</b> | <b>p</b> |
| Donor         | MSD-PTCy                           | Ref       |               |          |
|               | Younger Haplo-PTCy                 | 0.76      | 0.57, 1.01    | 0.0559   |
| Donor         | MSD-PTCy                           | Ref       |               |          |
|               | Younger Haplo: B-leader-Matched    | 0.65      | 0.48, 0.9     | 0.0087   |
|               | Younger Haplo: B-leader-Mismatched | 0.99      | 0.7, 1.39     | 0.9507   |
|               |                                    |           |               |          |
| Disease Stage | Early-Intermediate                 | Ref       |               |          |
|               | Advanced                           | 1.69      | 1.29, 2.21    | 0.0002   |
| HCT-CI        | 0-2                                | Ref       |               |          |
|               | >=3                                | 1.26      | 0.97, 1.64    | 0.0879   |
| D/R CMV       | Neg/Neg                            | Ref       |               |          |
|               | Pos/Pos                            | 1.88      | 1.3, 2.73     | 0.0009   |
|               | Pos/Neg                            | 1.52      | 0.85, 2.72    | 0.1540   |
|               | Neg/Pos                            | 1.79      | 1.2, 2.66     | 0.0042   |
|               |                                    |           |               |          |
| <b>NRM</b>    |                                    |           |               |          |
| Donor         | MSD-PTCy                           | Ref       |               |          |
|               | Younger Haplo-PTCy                 | 0.96      | 0.7, 1.33     | 0.8237   |
|               |                                    |           |               |          |
| Donor         | MSD-PTCy                           | Ref       |               |          |
|               | Younger Haplo: B-leader-Matched    | 0.87      | 0.61, 1.23    | 0.4281   |
|               | Younger Haplo: B-leader-Mismatched | 1.12      | 0.78, 1.6     | 0.5487   |
|               |                                    |           |               |          |
| Patient Age   | Continuous                         | 1.02      | 1.01, 1.03    | <.0001   |
| Disease Stage | Early-Intermediate                 | Ref       |               |          |
|               | Advanced                           | 1.57      | 1.22, 2.04    | 0.0005   |

|                                   |                                |      |            |        |
|-----------------------------------|--------------------------------|------|------------|--------|
| HCT-CI                            | 0-2                            | Ref  |            |        |
|                                   | >=3                            | 1.29 | 1, 1.65    | 0.0475 |
| D/R CMV                           | Neg/Neg                        | Ref  |            |        |
|                                   | Pos/Pos                        | 1.80 | 1.26, 2.55 | 0.0012 |
|                                   | Pos/Neg                        | 2.13 | 1.32, 3.42 | 0.0019 |
|                                   | Neg/Pos                        | 1.14 | 0.76, 1.7  | 0.5306 |
| Time to HCT                       | Continuous                     | 1.00 | 1, 1.01    | 0.3554 |
|                                   |                                |      |            |        |
| <b>Relapse*</b>                   |                                |      |            |        |
| Donor                             | MSD-PTCy                       | Ref  |            |        |
|                                   | Younger Haplo-PTCy             | 0.71 | 0.52, 0.98 | 0.0365 |
|                                   |                                |      |            |        |
| Donor                             | MSD-PTCy                       | Ref  |            |        |
|                                   | Younger Haplo: DRB1-Mismatched | 0.63 | 0.46, 0.87 | 0.0043 |
|                                   | Younger Haplo: DRB1-Matched    | 1.03 | 0.68, 1.57 | 0.8754 |
|                                   |                                |      |            |        |
| Conditioning                      | MAC                            | Ref  |            |        |
|                                   | RIC/NMA                        | 1.59 | 1.13, 2.22 | 0.0075 |
|                                   |                                |      |            |        |
| <b>Chronic GVHD</b>               |                                |      |            |        |
| Donor                             | MSD-PTCy                       | Ref  |            |        |
|                                   | Younger Haplo-PTCy             | 0.78 | 0.49, 1.25 | 0.3051 |
| Graft type                        | BM                             | Ref  |            |        |
|                                   | PB                             | 1.76 | 1.09, 2.84 | 0.0219 |
|                                   |                                |      |            |        |
| <b>Acute GVHD, grade II-IV **</b> |                                |      |            |        |
| Donor                             | MSD-PTCy                       | Ref  |            |        |
|                                   | Younger Haplo-PTCy             | 0.90 | 0.58, 1.39 | 0.6362 |

\* Stratified by Disease Stage

**\*\* Stratified by Race**

*Abbreviations are explained in Table S1.*

Initial cohort  
Haploidentical, n=1432  
MSD, n=401

Younger haploidentical, n=692  
Older haploidentical, n=740  
Younger MSD, n=240  
Older MSD, n=161

*Aim 1: Entire Cohort*

*Aim 2: Older Patients*

Propensity Score Matched Cohort

Haploidentical (n=1052) vs. MSD (n=400)

Younger haploidentical, n=266  
Older haploidentical, n=786

Younger MSD, n=239  
Older MSD, n=161

Propensity Score Matched Cohort

Younger Haploidentical (n=347) vs. Older MSD (n=143)
